# Supplementary material
Source: Springer Nature journal article supplement (https://www.springerprofessional.de/resource/supplementary/40294_2012_21_MOESM1_ESM.pdf/11899520)

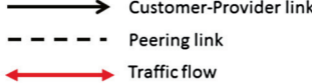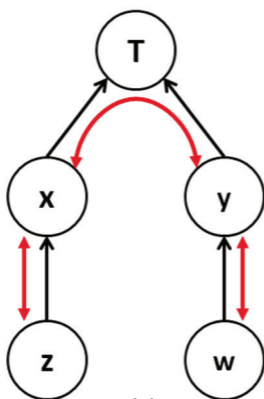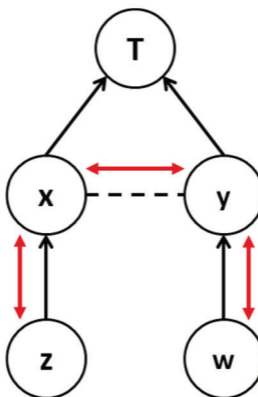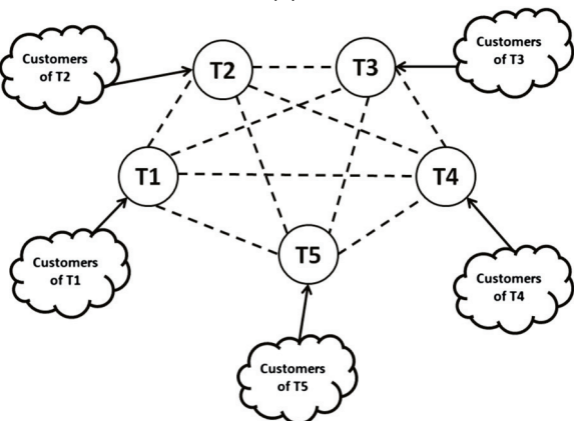

Supplement: MOESM1 [file 11899520]
